# Supplementary material
Source: HighWire-hosted journal article supplement (http://www.cmaj.ca/highwire/filestream/76169/field_highwire_adjunct_files/0/191540-image-1-at.pdf)
Supplement: 191540-image-1-at.pdf [file 191540-image-1-at.pdf]

**Appendix 1 (as submitted by the authors): Supplementary Figures**

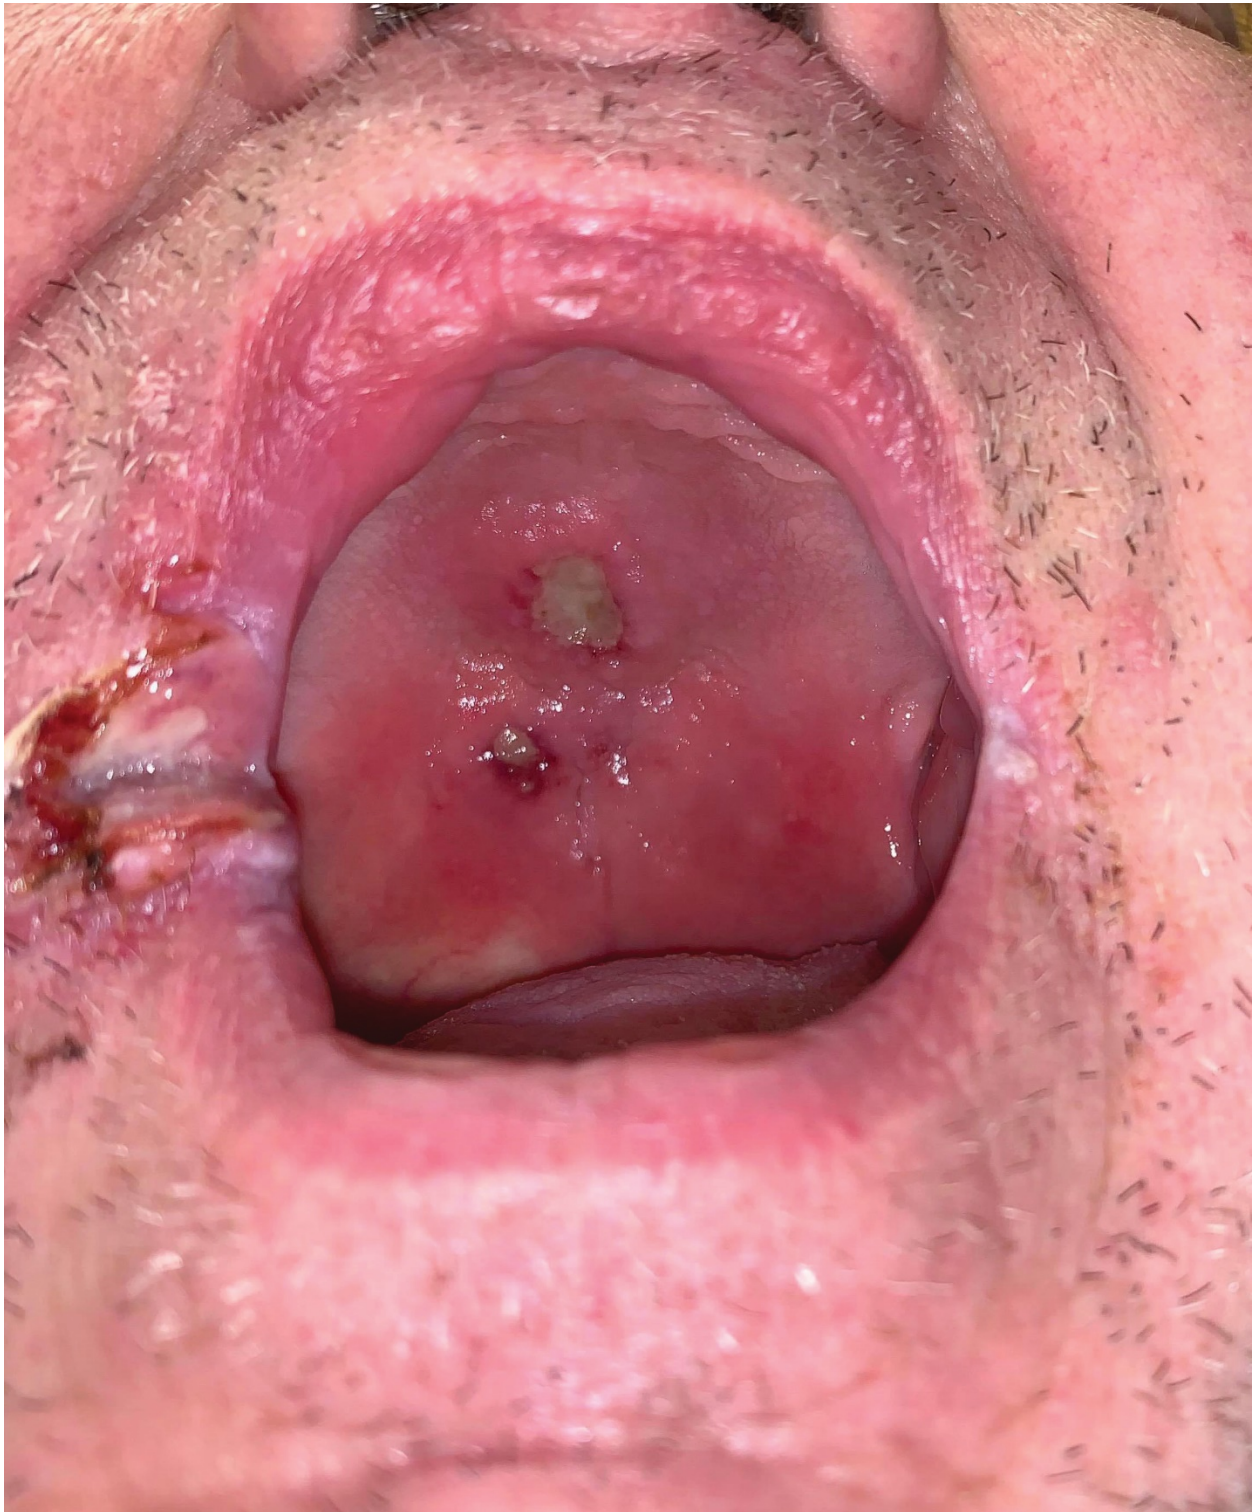

**Supplementary Figure 1:** Two ulcers with erythematous infiltrated borders on the hard palate with an erythematous inflammatory background.

Appendix to: Lemieux A, Belisle A, Luong M-L. Ulcerated nodule in a 50-year old man who underwent lung transplantation. *CMAJ* 2020.  
doi: 10.1503/cmaj.191540. Copyright © 2020 The Author(s) or their employer(s).

To receive this resource in an accessible format, please contact us at [cmajgroup@cmaj.ca](mailto:cmajgroup@cmaj.ca).

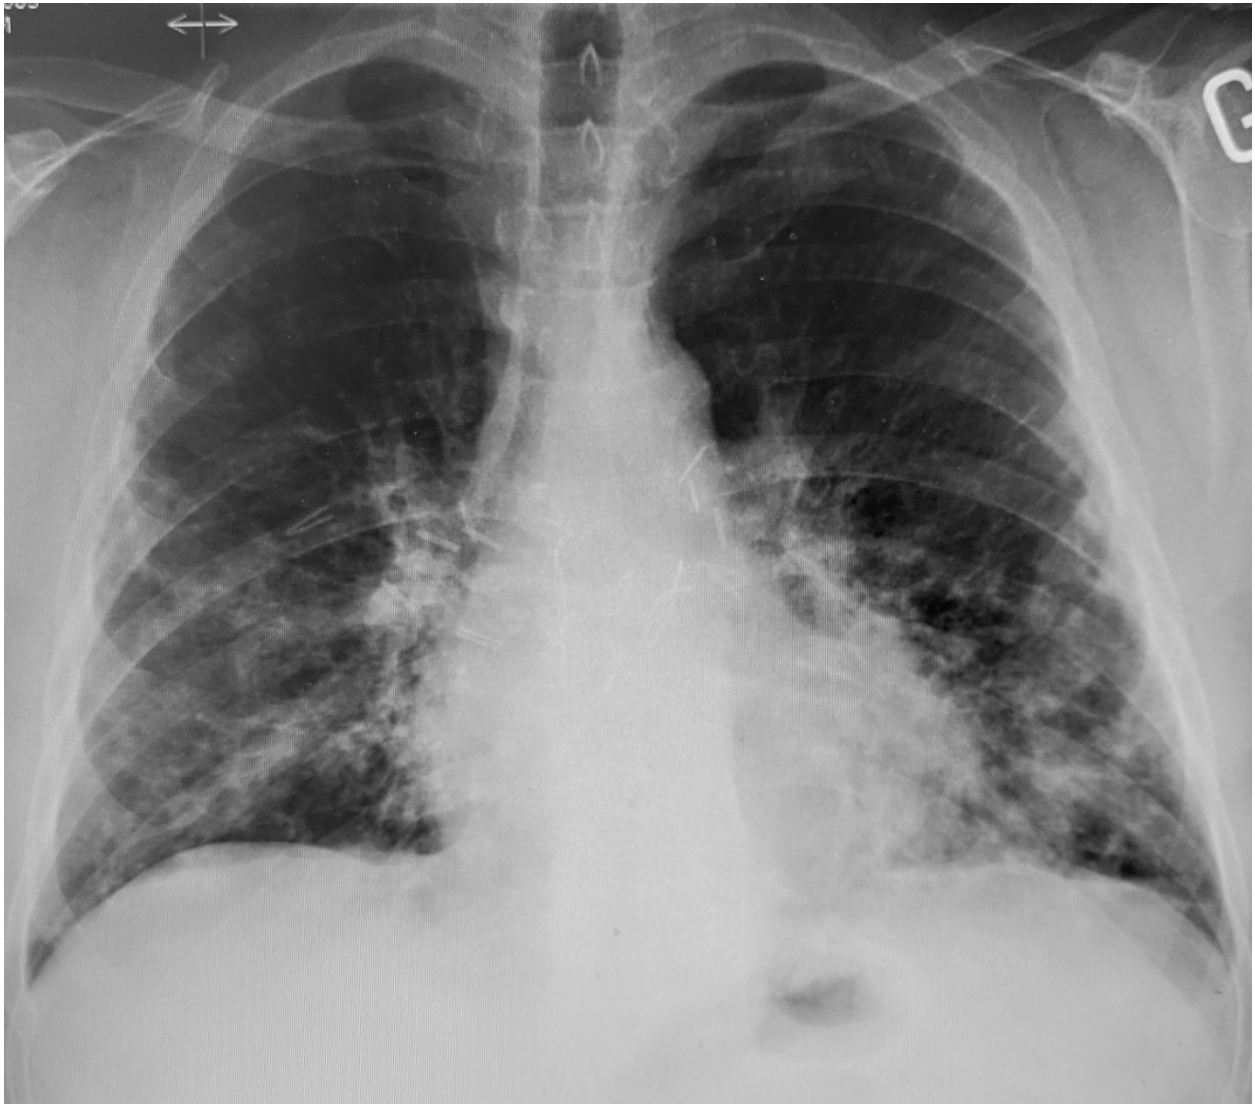

**Supplementary Figure 2:** Diffuse bilateral micronodular infiltrates predominating in the middle and lower lobes of the lungs.
